Title: DIFFERENT 1.2 MAC COMBINATIONS OF NITROUS OXIDE-ENFLURANE PRODUCE SPECIFIC METABOLIC RESPONSES IN RAT SPINAL CORD.

Authors: DJ Cole, M.D., HM Shapiro, M.D.

Affiliation: Department of Anesthesiology, University of California at San Diego, LaJolla, CA;  
Department of Anesthesiology, Loma Linda University, Loma Linda, CA.

**Introduction:** Nitrous oxide (N<sub>2</sub>O) and enflurane have been observed to have different neurophysiologic properties. This difference has led to hypotheses that these two anesthetics act at different sites or have distinct mechanisms of action.<sup>1</sup> In order to identify possible spinal cord interactive effects of N<sub>2</sub>O and enflurane (E), we studied the effect three different 1.2 MAC combinations of N<sub>2</sub>O and E had upon the local spinal cord metabolism of glucose (ISCMRG).

**Methods:** With prior approval by the Animal Studies Subcommittee, male, Sprague-Dawley rats (n = 30) of similar ages and weights were separated into three 1.2 MAC anesthetic groups. Following anesthetic induction and orotracheal intubation each rat was randomly placed on one of three 1.2 MAC anesthetic protocols: 1) 0% N<sub>2</sub>O-2.76% enflurane, 2) 30% N<sub>2</sub>O-2.28% enflurane, or 3) 60% N<sub>2</sub>O-2.12% enflurane. An additive 1.0 MAC value for each N<sub>2</sub>O/E combination was determined in previous studies in our lab, and the remaining 0.2 MAC of anesthesia was delivered as an E MAC fraction. A 120 minute anesthetic stabilization period was begun with equilibration of anesthetic gases verified by mass spectrometry sampling of end-tidal gases. Physiological variables (pH, PaO<sub>2</sub>, PaCO<sub>2</sub>, hematocrit, mean arterial pressure, and temperature) were monitored and maintained within normal limits. At the conclusion of the stabilization period 100  $\mu$ Ci/kg of 2-<sup>14</sup>C-deoxyglucose was administered and ISCMRG was determined by quantitative autoradiography.<sup>2</sup> Statistical analysis was performed on the physiological data and the metabolic values using Dunnett's t-test comparing treatment groups to control (0% N<sub>2</sub>O). P < 0.05 was used as significant.

**Results:** There were no significant differences between groups in any of the physiological variables. The metabolic data are summarized in Table 1. As N<sub>2</sub>O was increased from 0-30% (with E concomitantly reduced) there was an observed homogeneous activation of spinal cord metabolism, with a return to control values as N<sub>2</sub>O was further increased from 30-60%.

**Discussion:** The methodology of this study resembles the clinical use of N<sub>2</sub>O as a MAC fraction of E was replaced with an equal MAC fraction of N<sub>2</sub>O. However, with iso-MAC anesthetic combinations of N<sub>2</sub>O and E it is not possible to ascribe ISCMRG changes specifically to either drug. In previous studies when N<sub>2</sub>O was added to deepen an existing state of anesthesia a general increase in glucose metabolism was observed.<sup>3</sup> However, little effect upon glucose metabolism was observed when N<sub>2</sub>O was evaluated alone at anesthetic levels inadequate to attain surgical depths of anesthesia.<sup>4</sup>

Studied in the context of comparing iso-MAC combinations of anesthetic agents, we observed a biphasic response in the metabolic interaction between N<sub>2</sub>O and E in the spinal cord, in the rat. This may have clinical implications in choosing the optimal anesthetic regimen for surgical procedures during which the spinal cord is a risk for injury. Thus, further studies are necessary to determine if this interaction is present in humans, and

to elucidate similar interactions between N<sub>2</sub>O and other commonly used volatile anesthetic agents. If this concept is verified, the anesthetist may have more information to aid in decisions regarding combinations of N<sub>2</sub>O and volatile anesthetic agents that have favorable effects upon spinal cord metabolism.

#### CERVICAL

| GRAY MATTER  | 0% N <sub>2</sub> O | 30% N <sub>2</sub> O | 60% N <sub>2</sub> O |
|--------------|---------------------|----------------------|----------------------|
| Sub Gelat    | 58.7 $\pm$ 4.6      | 67.7 $\pm$ 5.3*      | 54.7 $\pm$ 6.0       |
| Dorsal Horn  | 64.0 $\pm$ 5.0      | 74.6 $\pm$ 6.0*      | 63.5 $\pm$ 5.7       |
| Ventral Horn | 62.7 $\pm$ 5.0      | 74.1 $\pm$ 5.9*      | 62.1 $\pm$ 5.2       |
| WHITE MATTER |                     |                      |                      |
| Dorsal       | 39.1 $\pm$ 3.7      | 50.9 $\pm$ 5.3*      | 37.6 $\pm$ 6.0       |
| Lateral      | 43.0 $\pm$ 4.3      | 56.1 $\pm$ 6.1*      | 41.8 $\pm$ 4.7       |
| Ventral      | 41.0 $\pm$ 4.0      | 51.6 $\pm$ 5.3*      | 37.9 $\pm$ 4.4       |

#### THORACIC

| GRAY MATTER  | 0% N <sub>2</sub> O | 30% N <sub>2</sub> O | 60% N <sub>2</sub> O |
|--------------|---------------------|----------------------|----------------------|
| Sub Gelat    | 53.0 $\pm$ 5.1      | 64.1 $\pm$ 5.2*      | 50.3 $\pm$ 7.1       |
| Dorsal Horn  | 55.4 $\pm$ 5.2      | 68.8 $\pm$ 6.3*      | 57.1 $\pm$ 5.4       |
| Ventral Horn | 56.9 $\pm$ 5.1      | 69.5 $\pm$ 6.2*      | 57.5 $\pm$ 5.1       |
| WHITE MATTER |                     |                      |                      |
| Dorsal       | 38.0 $\pm$ 4.7      | 48.5 $\pm$ 5.7*      | 37.9 $\pm$ 4.8       |
| Lateral      | 37.5 $\pm$ 5.0      | 49.6 $\pm$ 5.6*      | 37.1 $\pm$ 4.7       |
| Ventral      | 40.3 $\pm$ 6.0      | 50.6 $\pm$ 5.3*      | 39.0 $\pm$ 5.0       |

#### LUMBAR

| GRAY MATTER  | 0% N <sub>2</sub> O | 30% N <sub>2</sub> O | 60% N <sub>2</sub> O |
|--------------|---------------------|----------------------|----------------------|
| Sub Gelat    | 63.5 $\pm$ 6.1      | 72.4 $\pm$ 5.0*      | 60.9 $\pm$ 6.3       |
| Dorsal Horn  | 69.7 $\pm$ 6.0      | 79.0 $\pm$ 4.9*      | 71.8 $\pm$ 5.8       |
| Ventral Horn | 68.2 $\pm$ 6.0      | 80.7 $\pm$ 5.7*      | 73.1 $\pm$ 5.6       |
| WHITE MATTER |                     |                      |                      |
| Dorsal       | 43.2 $\pm$ 5.7      | 56.0 $\pm$ 5.9*      | 42.5 $\pm$ 5.2       |
| Lateral      | 52.9 $\pm$ 5.1      | 64.6 $\pm$ 6.0*      | 53.9 $\pm$ 6.3       |
| Ventral      | 51.2 $\pm$ 6.3      | 61.7 $\pm$ 5.0*      | 52.4 $\pm$ 5.8       |

Table 1 -Local Spinal Cord Metabolism of Glucose  
 $\mu$ mol/100g/min (mean  $\pm$  SD).  
\* difference from control (P < 0.05).

#### References:

1. Stevens JE, et al: Effects of nitrous oxide on the epileptogenic property of enflurane in cats. *Br J Anaesth* 55:145, 1983.
2. Sokoloff L, et al: The (14C-deoxyglucose method for measurement of local cerebral glucose utilization. *J of Neurochem* 28:897, 1977.
3. Sakabe T, et al: Local cerebral glucose utilization during nitrous oxide and pentobarbital anesthesia in rats. *ANES* 63:262, 1985.
4. Ingvar M, Siesjo BK: Effect of nitrous oxide on local cerebral glucose utilization in rats. *J of Cereb Blood Flow and Metab* 2:481, 1982.
